# Supplementary material for: Generation of Dipeptidyl Peptidase-IV-Inhibiting Peptides fromβ-Lactoglobulin Secreted byLactococcus lactis
Source: Hindawi journal article supplement (doi:10.1155/2014/393598), 2014-01-01
Supplement: f1 [file 393598.f1.pdf]

# Supplemental Figure 1

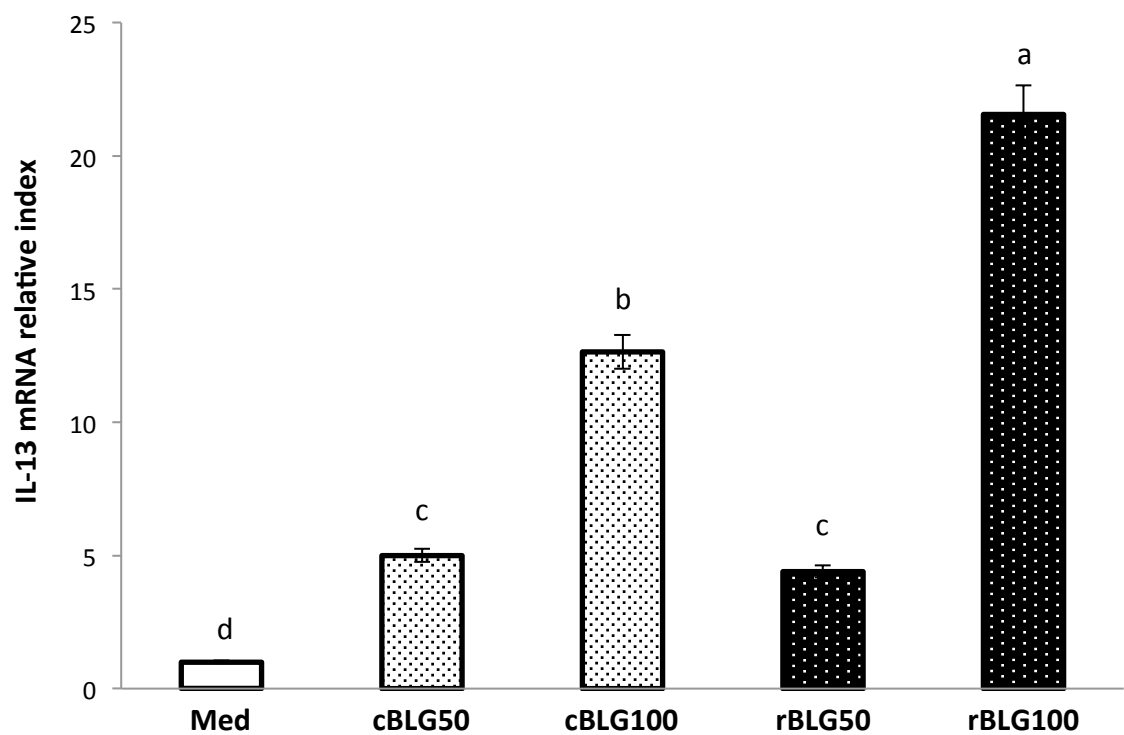

**Supplemental Figure 1:** Immunoreactivity of rBLG. Splenocytes isolated from cBLG-sensitized BALB/c mice were stimulated in medium with or without (*Med*; *white bar*) 50 or 100  $\mu\text{g/mL}$  of cBLG (*cBLG*; *dotted-white bar*) or purified rBLG (*rBLG*; *dotted-black bar*). After 72 h, IL-13 mRNA levels were measured using real-time qPCR. Values represent means and error bars indicate SD ( $n=3$ ). Items indicate with different letters (i.e. *a*, *b*, *c*, and *d*) were significantly different ( $p<0.01$ ). Similar results were obtained from three different mice.
